# Supplementary material for: How should we be using biomarkers in trials of disease modification in Parkinson’s disease?
Source: PubMed Central journal article supplement (PMC10690028; doi:10.1093/brain/awad265), 2023-08-03
Supplement: awad265_supplementary_data.pdf [file awad265_supplementary_data.pdf]

Supplementary Table 1 Summary of completed drug trials for disease-modification in Parkinson's disease that have explored the use of biomarkers.

| <b>Molecular target</b> | <b>Mechanism of action</b>                                                | <b>Drug(s)</b>                        | <b>Biomarker supporting target engagement</b>                                                                                                                                           | <b>Biomarker relationship with primary outcome</b> | <b>Biomarker result</b>                                                                                                                                                                                   |
|-------------------------|---------------------------------------------------------------------------|---------------------------------------|-----------------------------------------------------------------------------------------------------------------------------------------------------------------------------------------|----------------------------------------------------|-----------------------------------------------------------------------------------------------------------------------------------------------------------------------------------------------------------|
| Alpha-Synuclein         | Inhibition of $\alpha$ -synuclein aggregation (autophagy-cAbl inhibitors) | Nilotinib <sup>1</sup><br>NCT02954978 | CSF total & oligomeric alpha-synuclein & ratio, Dopamine metabolites (DOPAC, HVA) in CSF & Plasma, CSF total tau and P-tau 181, CSF-triggered receptors on myeloid cells levels, plasma | No correlation specified                           | Small amounts of nilotinib detected in the CSF, plasma DOPAC, but not CSF DOPAC or HVA level increased, reduction of $\alpha$ -synuclein oligomers, reduction of p-tau 181, decreased P-tau 181/total tau |

|  |                                                    |                                                 |                                                                                                                                                   |                                 |                                                                                                            |
|--|----------------------------------------------------|-------------------------------------------------|---------------------------------------------------------------------------------------------------------------------------------------------------|---------------------------------|------------------------------------------------------------------------------------------------------------|
|  |                                                    | <p>Nilotinib<sup>2</sup><br/>NCT03205488</p>    | <p>and CSF pan-tyrosine Abl, and plasma and CSF tyrosine 412 Abl (activity)</p>                                                                   |                                 |                                                                                                            |
|  |                                                    |                                                 | <p>Nilotinib levels (CSF &amp; serum) and dopamine metabolites (catecholamine catabolites and pre-cursors, serotonin &amp; metabolite) in CSF</p> | <p>No correlation specified</p> | <p>Poor CSF penetration (half-maximal inhibitory concentration),<br/>No change in dopamine metabolites</p> |
|  | <p>Anti-<math>\alpha</math>-synuclein antibody</p> | <p>Prasinezumab<sup>3</sup><br/>NCT03100149</p> | <p>DaT-SPECT Striatal Binding Ratio (SBR) in Putamen Ipsilateral to</p>                                                                           | <p>No correlation specified</p> | <p>No DaT-SPECT change, 4 had antidrug antibodies</p>                                                      |

|  |  |                                                                                       |                                                                                            |                             |                                                                                                                       |
|--|--|---------------------------------------------------------------------------------------|--------------------------------------------------------------------------------------------|-----------------------------|-----------------------------------------------------------------------------------------------------------------------|
|  |  |                                                                                       | Clinically Most Affected Side, Blood Anti-Drug Antibodies                                  |                             |                                                                                                                       |
|  |  | Cinpanemab <sup>4</sup><br>NCT03318523                                                | CSF $\alpha$ -synuclein seeding amplification assay to confirm presence, DaT-SPECT imaging | No correlation specified    | Plasma levels demonstrated dose proportionality, No DaT-SPECT change                                                  |
|  |  | Affitope (PD01A)<br>Active alpha synuclein immunization<br>(NCT01568099, NCT01885494, | Blood & CSF PD01A specific antibody and total $\alpha$ -synuclein levels.                  | Nil (Safety & tolerability) | Detected vaccine-triggered antibodies in blood and CSF, trend toward lower levels of alpha-synuclein in blood and CSF |

|              |                                                      |                                     |                                                                                                           |                                |                                                                                                                                                                                                                                    |
|--------------|------------------------------------------------------|-------------------------------------|-----------------------------------------------------------------------------------------------------------|--------------------------------|------------------------------------------------------------------------------------------------------------------------------------------------------------------------------------------------------------------------------------|
|              |                                                      | NCT02216188,<br>NCT02618941)        |                                                                                                           |                                |                                                                                                                                                                                                                                    |
| <b>LRRK2</b> | LRRK2 inhibitors<br>(promoting<br>autophagy)         | DNL201 <sup>5</sup><br>NCT03710707  | CSF & plasma<br>drug levels of<br>drug,<br>LRRK2<br>pS935&<br>pRab10 in<br>peripheral blood               | Nil (Safety &<br>tolerability) | LRRK2 pathway engagement and<br>alteration of downstream lysosomal<br>biomarkers, robust CSF penetration                                                                                                                           |
|              | Antisense<br>oligonucleotide for<br>LRRK2 inhibition | BIIB094 <sup>6</sup><br>NCT03976349 | Serum drug<br>concentration,<br>whole-blood<br>phosphorylated<br>serine 935<br>LRRK2,<br>peripheral blood | Nil (Safety &<br>tolerability) | CSF/unbound plasma concentration<br>ratio~1;<br>Whole-blood phosphorylated serine<br>935 LRRK2 ( $\leq 98\%$ ), peripheral<br>blood mononuclear cell<br>phosphorylated threonine 73<br>pRab10 ( $\leq 93\%$ ), cerebrospinal fluid |

|                           |                                                                            |                                                                                        |                                                                                                                               |                             |                                                                                                                                                      |
|---------------------------|----------------------------------------------------------------------------|----------------------------------------------------------------------------------------|-------------------------------------------------------------------------------------------------------------------------------|-----------------------------|------------------------------------------------------------------------------------------------------------------------------------------------------|
|                           |                                                                            |                                                                                        | mononuclear cell phosphorylated threonine 73 pRab10, cerebrospinal fluid total LRRK2, urine bis (mono-acylglycerol) phosphate |                             | total LRRK2 ( $\leq 50\%$ ), and urine bis (monoacylglycerol) phosphate ( $\leq 74\%$ )                                                              |
| <b>Lysosomal function</b> | Modulator of lysosomal enzyme $\beta$ -glucocerebrosidase (GCase) activity | Ambroxol <sup>7</sup><br>NCT02941822<br><br>*GBA status explored as baseline predictor | CSF drug levels, GCase activity and protein levels and $\alpha$ -synuclein levels                                             | No correlation specified    | Drug detected in CSF, GCase activity decreased, GCase protein levels increased, $\alpha$ -synuclein concentration increased<br>*GBA status no impact |
|                           |                                                                            | LTI-291 <sup>8</sup><br>NTR6598 (SAD) and NTR6705 (MAD)                                | CSF levels of drug and glycosphingolipids                                                                                     | Nil (Safety & tolerability) | Favorable pharmacokinetics, No glycosphingolipid changes<br><br>*GBA status no impact                                                                |

|                     |                                         |                                                                                     |                                                                                       |                             |                                                                                              |
|---------------------|-----------------------------------------|-------------------------------------------------------------------------------------|---------------------------------------------------------------------------------------|-----------------------------|----------------------------------------------------------------------------------------------|
| <b>Inflammation</b> |                                         | *GBA status explored as baseline predictor                                          |                                                                                       |                             |                                                                                              |
|                     | Substrate reduction                     | Venglustat <sup>9</sup><br>NCT02906020<br><br>*only GBA mutation carriers recruited | CSF & plasma drug, glucosylceramide & glucosylsphingosine levels                      | No correlation specified    | Dose proportional drug increase, Glucosylceramide decreased in treated group in CSF & plasma |
|                     | Altered T-cell lineage                  | Sargramostim <sup>10</sup><br>NCT01882010<br>NCT03790670                            | Immune phenotype and function, DNA methylation status, and gene and proteome analyses | No correlation specified    | Blood Treg numbers, function, and hypomethylation of upstream FOXP3 DNA elements increased   |
|                     | Enzyme myeloperoxidase (MPO) inhibition | AZD3241 <sup>11</sup><br>NCT01527695                                                | Plasma drug concentration & myelo-                                                    | Nil (Safety & tolerability) | Distribution volume of 11C-PBR28 binding to translocator protein reduced                     |

|                               |                                                            |                                              |                                                                                                                             |                                                                              |                                                                                                                                                                 |
|-------------------------------|------------------------------------------------------------|----------------------------------------------|-----------------------------------------------------------------------------------------------------------------------------|------------------------------------------------------------------------------|-----------------------------------------------------------------------------------------------------------------------------------------------------------------|
|                               |                                                            |                                              | peroxidase activity<br><br>Microglial PET imaging                                                                           |                                                                              | Sparse blood samples limited analysis                                                                                                                           |
|                               | 3-hydroxy-3-methylglutaryl-coenzyme A (HMG-CoA) inhibition | Lovastatin <sup>12</sup><br>NCT03242499      | F-dopa PET scan                                                                                                             | No correlation specified                                                     | Percentage change in the striatal 18F-dopa uptake ratio deteriorated less in the lovastatin group                                                               |
| <b>Mitochondrial function</b> | Improved mitochondrial biogenesis                          | Pioglitazone <sup>13,14</sup><br>NCT01280123 | Leukocyte PGC-1 $\alpha$ and target gene expression, plasma interleukin 6 (IL-6) and urine 8-hydroxy-deoxyguanosine (8OHdG) | Association of concentrations of biomarkers with change in total UPDRS score | Negative study<br>Baseline or changes from baseline in biomarker levels not associated with rate of progression,<br>Pioglitazone did not alter biomarker levels |

|  |                                   |                                                                                                                                                                                                      |                                                                                                            |                                                                                |                                                                                                                                                                                                                            |
|--|-----------------------------------|------------------------------------------------------------------------------------------------------------------------------------------------------------------------------------------------------|------------------------------------------------------------------------------------------------------------|--------------------------------------------------------------------------------|----------------------------------------------------------------------------------------------------------------------------------------------------------------------------------------------------------------------------|
|  | Increased urate,<br>(antioxidant) | <p>Inosine<sup>15</sup><br/>NCT02642393</p> <p>Inosine<sup>16</sup><br/>NCT00833690</p> <p>*Serum urate below<br/>population median<br/>concentration (&lt;5.8<br/>mg/dL) used for<br/>inclusion</p> | <p>Serum urate,<br/>striatal<br/>dopamine<br/>transporter<br/>binding</p> <p>Serum &amp; CSF<br/>urate</p> | <p>No correlation<br/>specified</p> <p>Nil (Safety &amp;<br/>tolerability)</p> | <p>Negative study</p> <p>Sustained elevation in serum urate<br/>from treatment</p> <p>No difference in dopamine<br/>transporter binding from treatment</p> <p>Urate levels rose in serum and CSF<br/>of treated groups</p> |
|--|-----------------------------------|------------------------------------------------------------------------------------------------------------------------------------------------------------------------------------------------------|------------------------------------------------------------------------------------------------------------|--------------------------------------------------------------------------------|----------------------------------------------------------------------------------------------------------------------------------------------------------------------------------------------------------------------------|



|             |                                 |                                                   |                                                                                                                                                                                                                        |                          |                                                                                                                                                                                                                                                                                                                                                             |
|-------------|---------------------------------|---------------------------------------------------|------------------------------------------------------------------------------------------------------------------------------------------------------------------------------------------------------------------------|--------------------------|-------------------------------------------------------------------------------------------------------------------------------------------------------------------------------------------------------------------------------------------------------------------------------------------------------------------------------------------------------------|
|             | Improved mitochondrial function | Ursodeoxycholic acid <sup>17</sup><br>NCT03840005 | ATP levels using <sup>31</sup> P MR spectroscopy                                                                                                                                                                       | No correlation specified | Increase in free energy and inorganic phosphate levels in the treatment group                                                                                                                                                                                                                                                                               |
| <b>Iron</b> | Iron chelation                  | Deferiprone <sup>18</sup><br>NCT02655315          | Iron levels in substantia nigra and striatum (MRI T2* sequence), changes in brain-structure volume (three-dimensional T1 sequence), serum ferritin levels, density of DaT quantified with SPECT DaT, & serum prolactin | No correlation specified | Clinical worsening in treatment group<br>Nigrostriatal iron content decreased more in the deferiprone group, No inverse correlation between brain-structure volumes and iron content, Iron content outside nigrostriatal pathway similar in trial groups, no difference DaT change, plasma ferritin decreased & plasma prolactin increased with deferiprone |

|                           |                                                                                                            |                                           |                                                                                                                                       |                          |                                                                                                                                                                                                                                                                               |
|---------------------------|------------------------------------------------------------------------------------------------------------|-------------------------------------------|---------------------------------------------------------------------------------------------------------------------------------------|--------------------------|-------------------------------------------------------------------------------------------------------------------------------------------------------------------------------------------------------------------------------------------------------------------------------|
| <b>Insulin resistance</b> | GLP-1 receptor agonists (reduced insulin resistance, reduced inflammation and alpha-synuclein aggregation) | Exenatide <sup>19,20</sup><br>NCT01971242 | Measures of insulin resistance (Akt, and mTOR signalling pathway) in serum neuronal derived exosomes, CSF drug levels, DATSCAN uptake | Association with UPDRS 3 | Positive clinical outcomes<br>Therapeutic drug levels in CSF<br>Exenatide treatment augmented insulin resistance pathways<br>Improvements in UPDRS 3 associated with downstream insulin resistance marker levels<br>Trend to improvement of DATSCAN signal in exenatide group |
|---------------------------|------------------------------------------------------------------------------------------------------------|-------------------------------------------|---------------------------------------------------------------------------------------------------------------------------------------|--------------------------|-------------------------------------------------------------------------------------------------------------------------------------------------------------------------------------------------------------------------------------------------------------------------------|

Abbreviations  $\alpha$ -syn /  $\alpha$ -synuclein; alpha-synuclein, ATP; adenosine triphosphate, c-Abl; Abelson tyrosine kinase, CNS; central nervous system, CSF; cerebrospinal fluid, GCase; DAT-SPECT; Dopamine transporter single-photon emission computerized tomography imaging, DOPAC; 3,4-Dihydroxyphenylacetic acid Glucocerebrosidase, HVA; Homovanillic acid, LRRK-2; Leucine-rich repeat kinase 2, MDS-UPDRS; Movement Disorders Society-Unified Parkinson Disease Rating Scale, PD; Parkinson's disease, PGC-1 $\alpha$ ; Peroxisome proliferator-activated receptor-gamma coactivator.

1. Pagan FL, Hebron ML, Wilmarth B, *et al.* Nilotinib Effects on Safety, Tolerability, and Potential Biomarkers in Parkinson Disease: A Phase 2 Randomized Clinical Trial. *JAMA Neurol.* Mar 1 2020;77(3):309-317. doi:10.1001/jamaneurol.2019.4200
2. Simuni T, Fiske B, Merchant K, *et al.* Efficacy of Nilotinib in Patients With Moderately Advanced Parkinson Disease: A Randomized Clinical Trial. *JAMA Neurol.* Mar 1 2021;78(3):312-320. doi:10.1001/jamaneurol.2020.4725

3. Pagano G, Taylor KI, Anzures-Cabrera J, *et al.* Trial of Prasinezumab in Early-Stage Parkinson's Disease. *N Engl J Med.* Aug 4 2022;387(5):421-432. doi:10.1056/NEJMoa2202867
4. Lang AE, Siderowf AD, Macklin EA, *et al.* Trial of Cinpanemab in Early Parkinson's Disease. *N Engl J Med.* Aug 4 2022;387(5):408-420. doi:10.1056/NEJMoa2203395
5. Jennings D, Huntwork-Rodriguez S, Henry AG, *et al.* Preclinical and clinical evaluation of the LRRK2 inhibitor DNL201 for Parkinson's disease. *Sci Transl Med.* Jun 8 2022;14(648):eabj2658. doi:10.1126/scitranslmed.abj2658
6. Jennings D, Huntwork-Rodriguez S, Vissers M, *et al.* LRRK2 Inhibition by BILB122 in Healthy Participants and Patients with Parkinson's Disease. *Mov Disord.* Mar 2023;38(3):386-398. doi:10.1002/mds.29297
7. Mullin S, Smith L, Lee K, *et al.* Ambroxol for the Treatment of Patients With Parkinson Disease With and Without Glucocerebrosidase Gene Mutations: A Nonrandomized, Noncontrolled Trial. *JAMA Neurol.* Apr 1 2020;77(4):427-434. doi:10.1001/jamaneurol.2019.4611
8. den Heijer JM, Kruithof AC, van Amerongen G, *et al.* A randomized single and multiple ascending dose study in healthy volunteers of LTI-291, a centrally penetrant glucocerebrosidase activator. *Br J Clin Pharmacol.* Sep 2021;87(9):3561-3573. doi:10.1111/bcp.14772
9. Peterschmitt MJ, Saiki H, Hatano T, *et al.* Safety, Pharmacokinetics, and Pharmacodynamics of Oral Venglustat in Patients with Parkinson's Disease and a GBA Mutation: Results from Part 1 of the Randomized, Double-Blinded, Placebo-Controlled MOVES-PD Trial. *J Parkinsons Dis.* 2022;12(2):557-570. doi:10.3233/JPD-212714
10. Olson KE, Namminga KL, Lu Y, *et al.* Safety, tolerability, and immune-biomarker profiling for year-long sargramostim treatment of Parkinson's disease. *EBioMedicine.* May 2021;67:103380. doi:10.1016/j.ebiom.2021.103380
11. Jucaite A, Svenningsson P, Rinne JO, *et al.* Effect of the myeloperoxidase inhibitor AZD3241 on microglia: a PET study in Parkinson's disease. *Brain.* Sep 2015;138(Pt 9):2687-700. doi:10.1093/brain/awv184
12. Lin CH, Chang CH, Tai CH, *et al.* A Double-Blind, Randomized, Controlled Trial of Lovastatin in Early-Stage Parkinson's Disease. *Mov Disord.* May 2021;36(5):1229-1237. doi:10.1002/mds.28474
13. Investigators NETiPDF-Z. Pioglitazone in early Parkinson's disease: a phase 2, multicentre, double-blind, randomised trial. *Lancet Neurol.* Aug 2015;14(8):795-803. doi:10.1016/S1474-4422(15)00144-1
14. Simon DK, Simuni T, Elm J, *et al.* Peripheral Biomarkers of Parkinson's Disease Progression and Pioglitazone Effects. *J Parkinsons Dis.* 2015;5(4):731-6. doi:10.3233/JPD-150666
15. Parkinson Study Group S-PDI, Schwarzschild MA, Ascherio A, *et al.* Effect of Urate-Elevating Inosine on Early Parkinson Disease Progression: The SURE-PD3 Randomized Clinical Trial. *JAMA.* Sep 14 2021;326(10):926-939. doi:10.1001/jama.2021.10207
16. Parkinson Study Group S-PDI, Schwarzschild MA, Ascherio A, *et al.* Inosine to increase serum and cerebrospinal fluid urate in Parkinson disease: a randomized clinical trial. *JAMA Neurol.* Feb 2014;71(2):141-50. doi:10.1001/jamaneurol.2013.5528

17. Payne T, Appleby M, Buckley E, *et al.* A Double-Blind, Randomized, Placebo-Controlled Trial of Ursodeoxycholic Acid (UDCA) in Parkinson's Disease. *Mov Disord.* May 29 2023;doi:10.1002/mds.29450
18. Devos D, Labreuche J, Rascol O, *et al.* Trial of Deferiprone in Parkinson's Disease. *N Engl J Med.* Dec 1 2022;387(22):2045-2055. doi:10.1056/NEJMoa2209254
19. Athauda D, Maclagan K, Skene SS, *et al.* Exenatide once weekly versus placebo in Parkinson's disease: a randomised, double-blind, placebo-controlled trial. *Lancet.* Oct 7 2017;390(10103):1664-1675. doi:10.1016/S0140-6736(17)31585-4
20. Athauda D, Gulyani S, Karnati HK, *et al.* Utility of Neuronal-Derived Exosomes to Examine Molecular Mechanisms That Affect Motor Function in Patients With Parkinson Disease: A Secondary Analysis of the Exenatide-PD Trial. *JAMA Neurol.* Apr 1 2019;76(4):420-429. doi:10.1001/jamaneurol.2018.4304
